# Supplementary material for: A simple chemical solution synthesis of nanowire-assembled hierarchical CuO microspheres with enhanced photochemical properties
Source: Royal Society of Chemistry journal article supplement (doi:10.1039/c8dt02931h), 2018-01-01
Supplement: c8dt02931h1.pdf [file c8dt02931h1.pdf]

Electronic Supplementary Material (ESI) for “*A simple chemical solution synthesis of nanowire-assembled hierarchical CuO microspheres with enhanced photochemical properties*”

Li Li<sup>1</sup>, Yongxing Zhang<sup>1\*</sup>, Jia Li<sup>1</sup>, Dong Ma<sup>1</sup>, Dechuan Li<sup>1</sup>, Guangping Zhu<sup>1</sup>, Huijie Tang<sup>2</sup>, and Xuanhua Li<sup>2\*</sup>

<sup>1</sup> Department of Materials Science and Engineering, Huaibei Normal University, Huaibei 235000, P. R. China

<sup>2</sup> Research & Development Institute of Northwestern Polytechnical University In Shenzhen, Shenzhen 518057, P. R. China

E-mail: zyx07157@mail.ustc.edu.cn; lixh32@nwpu.edu.cn

**Table S1.** Effect of experimental parameters on the morphology of CuO

| Sample | Reagent 1                              | Reagent 2        | Reagent 3                          | Reagent 4                       | Morphology                                                      |
|--------|----------------------------------------|------------------|------------------------------------|---------------------------------|-----------------------------------------------------------------|
| S0     | Cu(Ac) <sub>2</sub> · H <sub>2</sub> O | H <sub>2</sub> O | NH <sub>3</sub> · H <sub>2</sub> O |                                 | Hierarchical CuO microspheres assembled with nanosheets (HCMAS) |
| S1     |                                        |                  |                                    | Na <sup>+</sup> Ac <sup>-</sup> |                                                                 |
| S2     |                                        |                  |                                    | SO <sub>4</sub> <sup>2-</sup>   | Hierarchical CuO microspheres assembled with nanosheets (HCMAS) |
| S3     | Cu(Ac) <sub>2</sub> · H <sub>2</sub> O | H <sub>2</sub> O | NH <sub>3</sub> · H <sub>2</sub> O | NO <sub>3</sub> <sup>-</sup>    |                                                                 |
| S4     |                                        |                  |                                    | Cl <sup>-</sup>                 |                                                                 |
| S5     |                                        |                  |                                    | K <sup>+</sup> Ac <sup>-</sup>  |                                                                 |

|    |  |  |  |  |                    |
|----|--|--|--|--|--------------------|
| S6 |  |  |  |  | $\text{SO}_4^{2-}$ |
| S7 |  |  |  |  | $\text{NO}_3^-$    |
| S8 |  |  |  |  | $\text{Cl}^-$      |

**Table S2.** Effect of experimental parameters on the morphology of CuO

| Sample | Reagent 1                                            | Reagent 2            | Reagent 3                              | Reagent 4          | Morphology                                                      |
|--------|------------------------------------------------------|----------------------|----------------------------------------|--------------------|-----------------------------------------------------------------|
| S0     | $\text{Cu}(\text{Ac})_2 \cdot \text{H}_2\text{O}$    | $\text{H}_2\text{O}$ | $\text{NH}_3 \cdot \text{H}_2\text{O}$ |                    | Hierarchical CuO microspheres assembled with nanosheets (HCMAS) |
| S9     | $\text{Cu}(\text{Ac})_2 \cdot \text{H}_2\text{O}$    |                      |                                        |                    |                                                                 |
| S10    | $\text{CuCl}_2 \cdot 2\text{H}_2\text{O}$            |                      |                                        | $\text{Na}^+$      |                                                                 |
| S11    | $\text{Cu}(\text{NO}_3)_2 \cdot 3\text{H}_2\text{O}$ |                      |                                        |                    |                                                                 |
| S12    | $\text{CuSO}_4 \cdot 5\text{H}_2\text{O}$            | $\text{H}_2\text{O}$ | $\text{NH}_3 \cdot \text{H}_2\text{O}$ | $\text{CO}_3^{2-}$ | Hierarchical CuO microspheres assembled with nanowires (HMAW)   |
| S13    | $\text{Cu}(\text{Ac})_2 \cdot \text{H}_2\text{O}$    |                      |                                        |                    |                                                                 |
| S14    | $\text{CuCl}_2 \cdot 2\text{H}_2\text{O}$            |                      |                                        | $\text{K}^+$       |                                                                 |
| S15    | $\text{Cu}(\text{NO}_3)_2 \cdot 3\text{H}_2\text{O}$ |                      |                                        |                    |                                                                 |
| S16    | $\text{CuSO}_4 \cdot 5\text{H}_2\text{O}$            |                      |                                        |                    |                                                                 |
